# Supplementary material for: Characterization of Bacillus velezensis UTB96, Demonstrating Improved Lipopeptide Production Compared to the Strain B. velezensis FZB42
Source: MDPI journal article supplement (doi:10.3390/microorganisms10112225), 2022-11-10
Supplement: s1 [file s1]

# Supplementary Material S1

## Characterization of *Bacillus velezensis* UTB96, Demonstrating Improved Lipopeptide Production Compared to the Strain *B. velezensis* FZB42

Maliheh Vahidinasab <sup>1,\*</sup>, Isabel Adiek <sup>1</sup>, Behnoush Hosseini <sup>2</sup>, Stephen Olusanmi Akintayo <sup>1</sup>, Bahar Abrishamchi <sup>1</sup>, Jens Pfannstiel <sup>3</sup>, Marius Henkel <sup>4</sup>, Lars Lilge <sup>1</sup>, Ralf Voegelé <sup>2</sup> and Rudolf Hausmann <sup>1</sup>

<sup>1</sup>Department of Bioprocess Engineering (150k), Institute of Food Science and Biotechnology, University of Hohenheim, Fruwirthstraße 12, Stuttgart 70599, Germany

<sup>2</sup>Department of Phytopathology (360a), Institute of Phytomedicine, Faculty of Agricultural Sciences, University of Hohenheim, Otto-Sander-Str. 5, 70599 Stuttgart, Germany

<sup>3</sup>Core Facility Hohenheim, Mass Spectrometry Unit, University of Hohenheim, August-von-Hartmann-Str. 3, 70599 Stuttgart, Germany

<sup>4</sup>Department of Cellular Agriculture, TUM School of Life Science, Technical University of Munich, Gregor-Mendel-Str. 4, 85354 Freising, Germany

\*Corresponding author: vahidin@uni-hohenheim.de

**Supplementary Material S1.** List of primers used in this study for amplification of iturin A operon in *Bacillus velezensis* UTB96

| Name    | Sequence 5' – 3'      | Purpose                                                                                            |
|---------|-----------------------|----------------------------------------------------------------------------------------------------|
| s1250 F | GCCGTCATACAATTGAATCAG | Sequencing of nucleotide gaps<br>in the <i>ituB</i> gene from <i>B.</i><br><i>velezensis</i> UTB96 |
| s1194 R | ATACGGTGCAAATGGTTCAAC |                                                                                                    |
| s1661 F | GTTTCCGTCAGGAAGGTAAC  |                                                                                                    |
| s1662 R | GAGATTGTGTCAGACGGTG   |                                                                                                    |
| s1689 F | GCTCCGGATCAATAGGAAG   |                                                                                                    |
| s1690 R | GTGGGGATCAGAGATCAC    |                                                                                                    |
| s1665 F | GCTGACGATAAGTCAGTGTC  |                                                                                                    |
| s1666 R | CAACCATTGAACAGCTCGC   | Sequencing of nucleotide gaps<br>in the <i>ituC</i> gene from <i>B.</i><br><i>velezensis</i> UTB96 |
| s1201 F | CCGCTTCTTTGACAGCATC   |                                                                                                    |
| s1255 R | CGATATATCGAATGGCTGG   |                                                                                                    |
| s1254 F | CCAGCCATTTCGATATATCG  |                                                                                                    |
| s1200 R | CTGGGATTGTTTCAATGTCAG |                                                                                                    |
| s1659 F | CGGCCAGTATTTTTTCCAG   |                                                                                                    |
| s1660 R | TGGTTCTCCTGGTCGGAAT   |                                                                                                    |
